# Supplementary material for: Integrative Analysis of Multi-omics Data Expands Druggable Targets for Circadian Medicine
Source: Research Square preprint supplement (doi:10.21203/rs.3.rs-7255570/v1), 2025-08-08
Supplement: Supplementary file 1 [file dcf9f4e69129810afb57e344.pdf]

Supplementary Information for

**Integrative Analysis of Multi-omics Data Expands Druggable Targets  
for Circadian Medicine**

Ying Chen, Chengxuan Chen, Dishu Zhou, Panpan Liu, Roberto E López-Valiente,  
Yuan Liu, Cam Mong La, Isabella Beraldo Xavier, Pradip Saha, Zheng Sun, Leng Han,  
Dongyin Guan

Corresponding author:

Leng Han, Ph.D. (lenghan@iu.edu)  
Dongyin Guan, Ph.D. (dongyin.guan@bcm.edu)

**The PDF file includes:**

Supplementary Figures 1 to 6

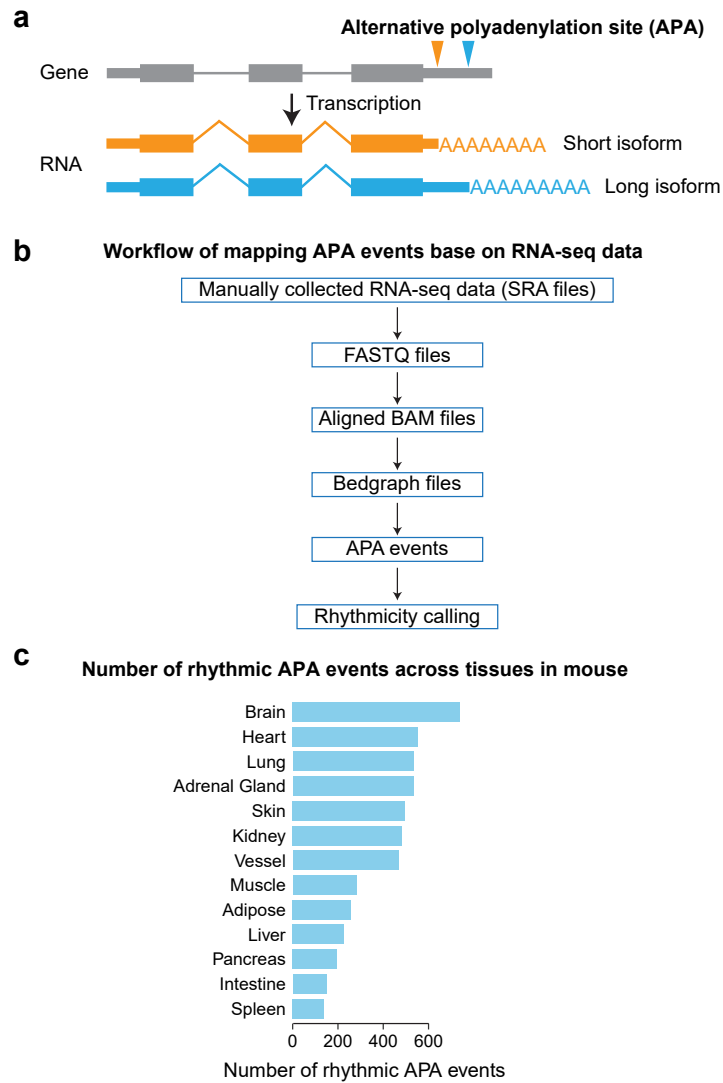

**Figure S1. Mapping and characterization of rhythmic alternative polyadenylation (APA) events from RNA-seq data.** **a** Schematic illustration of alternative APA. A gene can produce multiple transcript isoforms by utilizing different polyadenylation (polyA) sites, resulting in short and long isoforms with distinct 3' ends. **b** Workflow for mapping APA events and detecting rhythmicity based on RNA-seq data. Publicly available RNA-seq datasets were manually collected and processed through a pipeline including read alignment, coverage profiling, APA event detection, and rhythmic APA events identification. **c** Number of rhythmic APA events detected across different tissues in mouse.

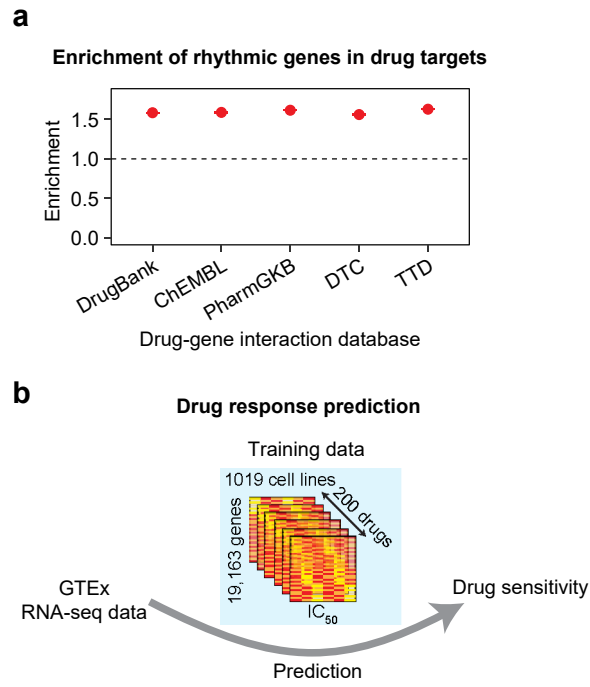

**Figure S2. Enrichment of rhythmic genes in drug targets.** **a** Analysis of rhythmic gene enrichment in drug targets. The enrichment is calculated as the ratio of observed rhythmic drug target genes to the expected number. The expected rhythmic gene set was generated by randomly selecting genes from all expressed genes. Random sampling was performed 1,000 times, and the median number of drug targets in the 1,000 expected rhythmic gene sets was used as the expectation. **b** Schematic illustrating the prediction of drug responses as described by Li et al.

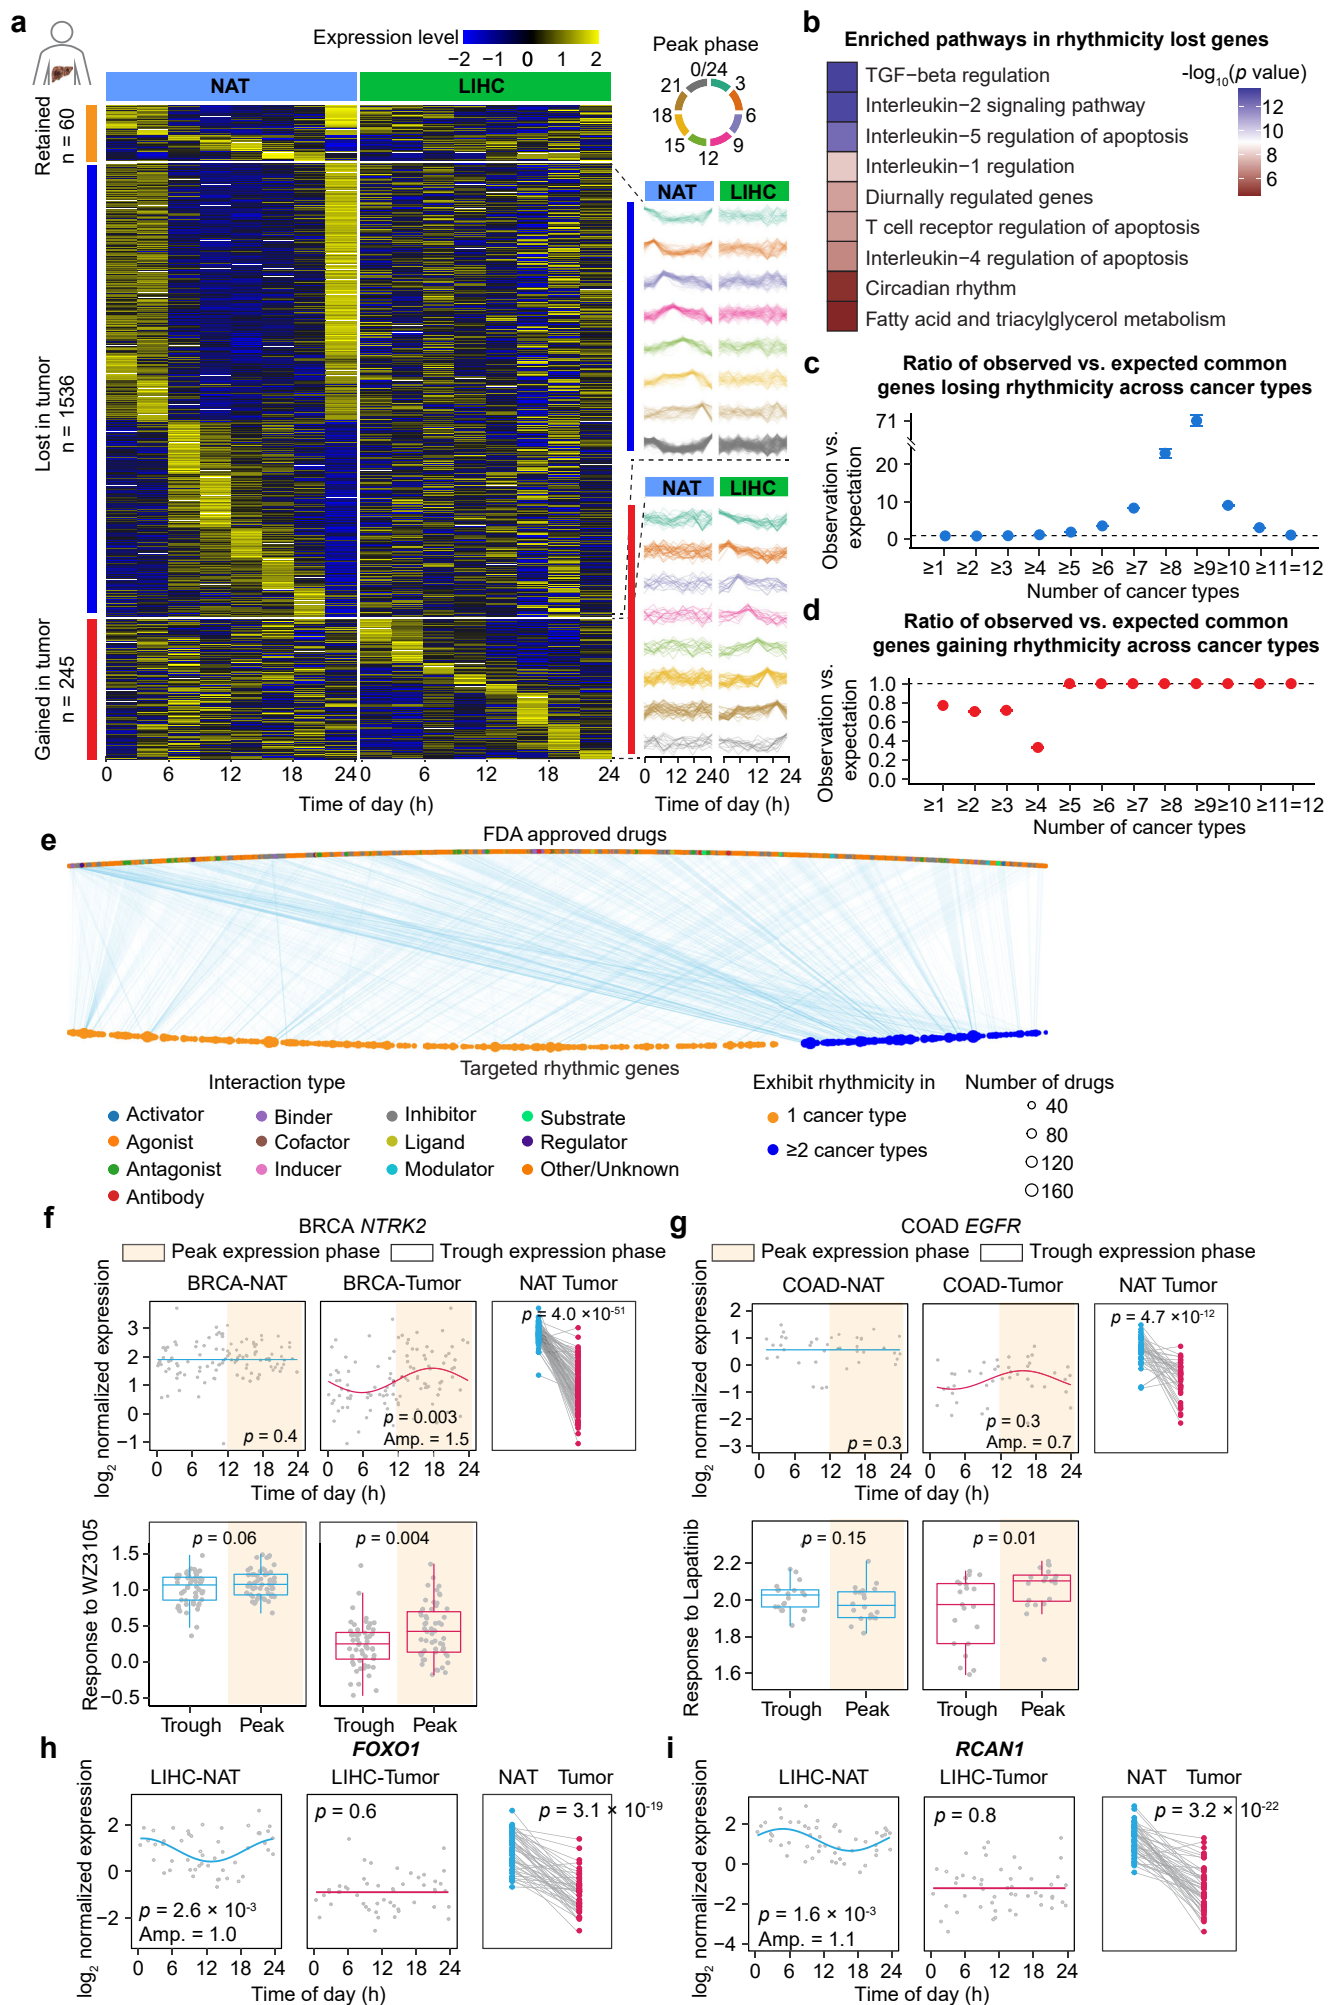

**Figure S3. Rhythmic gene expression alterations in cancer.** **a** Heatmap of rhythmic gene expression in human normal liver and liver tumor tissues. **b** Pathway enrichment analysis of rhythmic genes lost in human liver tumor tissue. **c-d** Ratio of observed to expected genes with rhythmicity commonly lost (**c**) and gained (**d**) across multiple cancer types. **e** Associations between drugs and rhythmic genes. **f-g** The predicted drug responses for the drugs of WZ3105 (**f**) and Lapatinb (**g**) in individuals with different genotypes and internal circadian phases. **(h-i)** The rhythmic expression of *FOXO1* (**h**) and *RCAN1* (**i**) in liver cancer.

**% of drug targets exhibiting rhythmic expression in mice**

Exhibit rhythmicity? ■ Yes ■ No

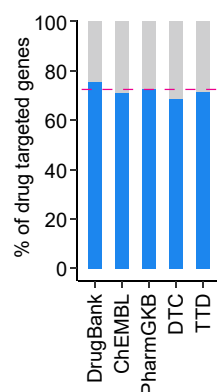

Drug-gene interaction database

**Figure S4. Percentage of drug targets exhibiting rhythmic expression in mice.** Rhythmic drug targets are identified based on rhythmic transcriptomic profiles from various tissues under normal physiological conditions.

a

## Gene search interface

**Find your gene**

Gene Name

Examples: **CLOCK**, ENSG00000134852

| Gene  | GeneID             | Organism     | Tissue | Regulation    | Action                                |
|-------|--------------------|--------------|--------|---------------|---------------------------------------|
| CLOCK | ENSG00000134852    | Homo sapiens | Liver  | Transcription | <input type="button" value="Search"/> |
| CLOCK | ENSPANG0000006882  | Papio anubis | Liver  | Transcription | <input type="button" value="Search"/> |
| Clock | ENSMUSG00000029238 | Mus musculus | Liver  | Transcription | <input type="button" value="Search"/> |

Showing 1 to 3 of 3 entries

Select tissue: Liver, Adipose, Adrenal Gland, Bone Marrow, Brain, Colon, Connective, Gallbladder, Heart, Immune, In vitro, Intestine, Kidney, Lung, Muscle

Select regulatory level: APA, Epigenome, Metabolomics, Protein, Transcription, Translation

b

## Results of single-gene search

**EZH2**

**ENSEMBL ID:** ENSG00000106462 **Gene Type:** PROTEIN\_CODING **DrugBank:** tazemetostat

**Synonyms:** ENX-1; EZH1; KMT6; KMT6A **Gene Region:** Chr7:148807257-148884321 (-) **Organism:** **Homo sapiens**

**Full Name:** enhancer of zeste 2 polycomb repressive complex 2 subunit **UniProt:** Q15910 **Tissue:** **Liver** **FDA approved drug**

**Search results for Transcription**

Show 25 entries

Input keyword to filter records:

| Tissue | Tissue subdivision | Condition | Diet | p-value | q-value | Amplitude | Phase | PMID     | GSE ID   | Plot                                                                                 |
|--------|--------------------|-----------|------|---------|---------|-----------|-------|----------|----------|--------------------------------------------------------------------------------------|
| Liver  | Liver              | WT ALF    | --   | 0       | 0       | 909.067   | 1.360 | 19343201 | GSE11923 | 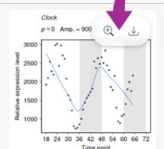 |

c

## Genetic variation query interface

## rhyQTLs Module:

To uncover how genetic variation contributes to rhythmic regulation, we systematically mapped rhythmic expression quantitative trait loci (rhyQTLs) across 45 human tissues ( [Nature Communication 2025](#)). These genome-wide associations link genetic variants to inter-individual differences in rhythmic gene expression patterns. The rhyQTL model provides novel insights into rhythm-linked disease risk and enables personalized chronomedicine strategies.

## Rhythmic QTLs

Select a human Tissue:

☒ Or Gene Name:

☐ Or Gene ID:

☐ Or SNP ID:

Download results

**Search results**

Show 25 entries

| rsID       | Chromosome | Position | REF | ALT | rhyGene.ID      | rhyGene.name | Sample.size.0 | Sample.size.1 | Sample.size.2 | Pvalue.Moc |
|------------|------------|----------|-----|-----|-----------------|--------------|---------------|---------------|---------------|------------|
| rs10947121 | chr6       | 31032220 | T   | C   | ENSG00000204472 | AIF1         | 167           | 157           | 61            | 0.297      |
| rs3094112  | chr6       | 30793957 | T   | C   | ENSG00000204472 | AIF1         | 243           | 127           | 15            | 1.480e-4   |
| rs3094117  | chr6       | 30769709 | A   | C   | ENSG00000204472 | AIF1         | 202           | 160           | 23            | 1.360e-4   |
| rs3131051  | chr6       | 30792404 | G   | A   | ENSG00000204472 | AIF1         | 192           | 122           | 71            | 0.942      |

**Figure S5. Overview of query interfaces in the RHINO platform.** **a** Gene search interface. Users can search for a gene of interest by name or ENSEMBL ID, and select the organism, tissue, and regulatory layer (e.g., transcription, translation, APA, etc.) to explore its rhythmicity. **b** Results of single-gene search. The output includes a gene summary and rhythmicity parameters such as amplitude, phase, and statistical significance, along with visualizations. **c** Genetic variation query interface. Users can search for genetic variations associated with rhythmic expression by gene name, ENSEMBL ID, or SNP ID across human tissues, and download the corresponding results.



a

## Batch rhythm analysis of gene lists

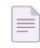

## Upload Gene List

Check whether genes are rhythmic across species and tissues

Choose File No file chosen

Choose your gene list file

Analyze Gene List

Example Gene List

Download example file

Please upload a plain text file (.txt), with one gene name per line.

Gene list format

## Rhythmicity Analysis Results

## Analysis results

Download Table

Download the results

Input keyword to filter records

Search:

| Species | Tissue  | Tissue Subdivision         | Condition | Symbol | Gene Id            | P Value | Amplitude | Phase | GSE ID   | PMID     |
|---------|---------|----------------------------|-----------|--------|--------------------|---------|-----------|-------|----------|----------|
| Baboon  | Adipose | Omental Fat                | WT        | ARNTL  | ENSPANG00000006538 | 1.58e-9 | 17.80     | 13.45 | GSE98965 | 29439024 |
| Baboon  | Adipose | Omental Fat                | WT        | SMNDC1 | ENSPANG00000020805 | 0.55    | 1.47      | 19.97 | GSE98965 | 29439024 |
| Baboon  | Adipose | Omental Fat                | WT        | PKMYT1 | ENSPANG00000021736 | 0.19    | 0.07      | 8.84  | GSE98965 | 29439024 |
| Baboon  | Adipose | White Adipose Subcutaneous | WT        | PER1   | ENSPANG00000023840 | 5.60e-6 | 9.46      | 1.35  | GSE98965 | 29439024 |

b

## Rhythmicity detection from user's expression matrix

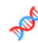

## Upload Expression Data

Analyze 24-hour rhythmic patterns from time-series expression matrix

Choose File No file chosen

Choose your expression file

Analyze Expression

Example Expression Matrix

Download example file

Please upload a plain text .txt file with gene expression data. The first column should contain gene names; other columns should be named as (e.g., S1-6-1), using the middle number as the time point.

File format

## Input file

Numbers in the second element will be extracted as time points

| Gene         | WT-1-R1 | WT-1-R2 | WT-1-R3 | WT-4-R1 | WT-4-R2 | WT-4-R3 | WT-7-R1 | WT-7-R2 | WT-7-R3 | WT-10-R1 | WT-10-R2 |
|--------------|---------|---------|---------|---------|---------|---------|---------|---------|---------|----------|----------|
| 0610005C13Ri | 163.119 | 175.803 | 198.263 | 183.490 | 186.460 | 216.533 | 261.458 | 225.287 | 215.612 | 248.060  | 242.57   |
| 0610009B22Ri | 39.323  | 39.268  | 33.795  | 43.076  | 37.753  | 45.886  | 32.824  | 39.938  | 29.486  | 31.642   | 25.90    |
| 0610010F05Ri | 3.750   | 4.878   | 1.928   | 3.471   | 3.655   | 3.903   | 1.729   | 4.346   | 5.742   | 5.918    | 0.96     |
| 0610012G03Ri | 19.709  | 21.506  | 22.272  | 23.485  | 23.215  | 30.301  | 25.154  | 18.992  | 26.681  | 28.202   | 20.36    |
| 0610030E20Ri | 7.276   | 9.801   | 9.645   | 14.424  | 7.131   | 0.000   | 4.540   | 7.788   | 0.000   | 0.000    | 11.18    |
| 0610031O16Ri | 36.978  | 28.344  | 30.607  | 25.346  | 30.484  | 20.539  | 26.695  | 26.941  | 26.296  | 29.170   | 32.41    |

## Expression Rhythm Analysis Results

## Analysis results

Download Table

Download the results

Input keyword to filter records

Search:

| CyclD         | JTK Pvalue | JTK BH Q | JTK Period | JTK Adjphase | JTK Amplitude | LS Pvalue | LS BH Q | LS Period | LS Adjphase | LS Amplitude | Meta2d Pvalue | Meta2d BH Q | N |
|---------------|------------|----------|------------|--------------|---------------|-----------|---------|-----------|-------------|--------------|---------------|-------------|---|
| 0610005C13Rik | 7.95e-5    | 3.97e-4  | 24         | 10           | 27.2          | 9.39e-3   | 0.06    | 21.63     | 9.24        | 238.53       | 1.13e-5       | 5.64e-5     |   |
| 0610009B22Rik | 1          | 1        | 21         | 20.5         | 4.21          | 0.99      | 1       | 20        | 16.64       | 39.02        | 1             | 1           |   |

**Figure S6. Web interfaces for user-submitted rhythmicity analysis.** **a** Batch rhythm analysis of gene lists. Users can upload a list of gene names to assess whether these genes exhibit rhythmic expression across species, tissues, and conditions. The output includes rhythmicity statistics such as  $p$  value, amplitude, and phase. **b** Rhythmicity detection from user-submitted expression matrices. Users can upload time-series gene expression data to identify 24-hour rhythmic patterns, allowing direct evaluation of rhythmicity in their own datasets.
